1                   **Construction of soil defined media using quantitative exometabolomic**  
2                                           **analysis of soil metabolites**

3  
4 Stefan Jenkins<sup>1#</sup>, Tami L. Swenson<sup>1</sup>, Rebecca Lau<sup>1</sup>, Andrea Rocha<sup>2,3</sup>, Alex Aaring<sup>1</sup>, Terry C. Hazen<sup>2,4</sup>,  
5 Romy Chakraborty<sup>1</sup>, Trent Northen<sup>1,5\*</sup>

6  
7  
8  
9 **Affiliations**

- 10 1. Lawrence Berkeley National Laboratory, 1 Cyclotron Road, Berkeley CA 94720  
11 2. Oak Ridge National Laboratory, 1 Bethel Valley Rd, Oak Ridge TN 37831  
12 3. Geosyntec Consultants, 180A Market Place Blvd., Knoxville, TN 37922  
13 4. University of Tennessee, 676 Dabney Hall, Knoxville TN 37996  
14 5. Joint Genome Institute, Department of Energy, 2800 Mitchell Dr, Walnut Creek CA 94598

15  
16 \*Corresponding author: [tmorthen@lbl.gov](mailto:tmorthen@lbl.gov)

17 #Current address: Intrexon Corporation, 1750 Kraft Dr, Blacksburg VA 24060

18

19 **Abstract**

20 Exometabolomics enables analysis of metabolite utilization of low molecular weight organic  
21 substances by soil isolates. Environmentally-based defined media are needed to examine ecologically  
22 relevant patterns of substrate utilization. Here, we describe an approach for the construction of defined  
23 media using untargeted characterization of water soluble soil metabolites. To broadly characterize soil  
24 metabolites, both liquid chromatography mass spectrometry (LC/MS) and gas chromatography mass  
25 spectrometry (GC/MS) were used. With this approach, 96 metabolites were identified, including amino  
26 acids, amino acid derivatives, sugars, sugar alcohols, mono- and di-carboxylic acids, osmolytes,  
27 nucleobases, and nucleosides. From this pool of metabolites, 25 were quantified. Water soluble organic  
28 carbon was fractionated by molecular weight and measured to determine the fraction of carbon accounted  
29 for by the quantified metabolites. This revealed that, much like soil microbial community structures, these  
30 soil metabolites have an uneven quantitative distribution, with a single metabolite, trehalose accounting  
31 for 9.9 percent of the (< 1 kDa) water extractable organic carbon. This quantitative information was used  
32 to formulate two soil defined media (SDM), one containing 23 metabolites (SDM1) and one containing  
33 46 (SDM2). To evaluate SDM for supporting the growth of bacteria found at this field site, we examined  
34 the growth of 30 phylogenetically diverse soil isolates obtained using standard R2A medium. The simpler  
35 SDM1 supported the growth of up to 13 isolates while the more complex SDM2 supported up to 25  
36 isolates. One isolate, *Pseudomonas corrugata* strain FW300-N2E2 was selected for a time-series  
37 exometabolomics analysis to investigate SDM1 substrate preferences. Interestingly, it was found that this  
38 organism preferred lower-abundance substrates such as guanine, glycine, proline and arginine and glucose  
39 and did not utilize the more abundant substrates maltose, mannitol, trehalose and uridine. These results  
40 demonstrate the viability and utility of using exometabolomics to construct a tractable environmentally  
41 relevant media. We anticipate that this approach can be expanded to other environments to enhance  
42 isolation and characterization of diverse microbial communities.

43

44

45 **Highlights**

- 46 • LC/MS and GC/MS analyses of soil extracts revealed a diversity of 96 metabolites.
- 47 • Soil defined media were constructed based on water extractable soil metabolomics data.
- 48 • The defined media supported the growth of 25 out of 30 bacterial isolates.
- 49 • Exometabolomics demonstrated preferential consumption of amino acids for one isolate.
- 50 • These media can be used to understand environmentally relevant microbial substrate preferences.

51

52 **Keywords**

53 soil defined media, water extractable organic matter, exometabolomics, liquid chromatography mass  
54 spectrometry, gas chromatography mass spectrometry

55

56 **Abbreviations**

57 DOM dissolved organic matter; SOM soil organic matter; WEOC water extractable organic carbon;  
58 LMWOS low molecular weight organic substances; SDM(1/2) soil defined media (1 and 2); R2A  
59 Reasoner's 2A agar medium; ORFRC Oak Ridge Field Research Center; LC/MS liquid chromatography  
60 mass spectrometry; GC/MS gas chromatography/ mass spectrometry; TOC total organic carbon; HILIC  
61 hydrophilic interaction liquid chromatography

62

## 63 **1. Introduction**

64           Soil organic matter, historically considered to be composed of large polymeric humic substances,  
65 is now thought to largely consist of microbial products (Schmidt et al., 2011). Traditionally, the water  
66 soluble fraction of soil carbon, known as dissolved organic carbon or matter (DOC/DOM), is defined as  
67 the fraction that passes through a 0.45  $\mu\text{m}$  filter (Ohno et al., 2014). Many microbes process  
68 macromolecular substrates such as plant biomass extracellularly and uptake the resulting low molecular  
69 weight organic substances (LMWOS). Thus, it is not surprising that the water extractable organic carbon  
70 (WEOC)(Boyer and Groffman, 1996; Guigue et al., 2014) is associated with high microbial activity and  
71 soil respiration (Haney et al., 2012). Examination of the composition of LMWOS using metabolomic  
72 methods has revealed a diversity of small molecule metabolites (Warren, 2014; Swenson et al., 2015b).  
73 Recently, we observed exometabolite niche partitioning in sympatric soil microbes indicating that there  
74 can be a strong linkage between the composition of soil exometabolites and microbial community  
75 structure (Baran et al., 2015). This reinforces long-standing views that it is desirable for culture media to  
76 approximate the conditions, especially the quality and abundance of metabolites found within their  
77 habitat. This raises the exciting possibility that soil metabolomics methods can help inform the  
78 development of relevant culture media to enable laboratory studies investigating microbial resource  
79 partitioning.

80           Most of our understanding of the biology of soil microbes is based on the small fraction of  
81 microbes that have been successfully cultivated in isolation. Reasoner's 2A agar medium (R2A) is one of  
82 the most widely used for isolations and was developed for the cultivation of bacteria found in potable  
83 water (Reasoner and Geldreich, 1985). Its effectiveness may be attributable to its rich nutrients (peptone,  
84 casamino acids and yeast extract). However, the composition of R2A is dramatically different from the  
85 composition of soil LMWOS, and therefore has limited ecological relevance. There are many promising  
86 new technologies for isolating soil microbes with direct connection to the native small molecule  
87 environment (Pham and Kim, 2012) such as the use of transwell plates, soil substrate membranes, and

88 recently the iCHIP that enables diffusion of native DOM into the plates for isolations (Svenning et al.,  
89 2003; Ferrari et al., 2008; Ling et al., 2015).

90 Exometabolomics enables the study of the transformation of the small molecule environment by  
91 bacteria and other microorganisms by comparing spent media to non-inoculated controls, typically using  
92 mass spectrometry. This direct assessment of phenotype provides high-resolution of metabolite depletion  
93 which is emerging as a powerful complement to existing broader techniques such as bulk soil respiration  
94 and carbon transformation measurements (Butler et al., 2003; Miller et al., 2005; Schimel and Mikan,  
95 2005; Fernandes et al., 2013; Tucker et al., 2014). Previous studies have demonstrated the capability of  
96 exometabolomics in providing a functional complement to genomic and transcriptomic data (Baran et al.,  
97 2013; Liebeke and Lalk, 2014). Recently, exometabolomics was used with soil microbes and a microbial  
98 extract media to discover exometabolite niche partitioning for the 13 isolates and 2 environments  
99 examined (Baran et al., 2015). However, a limitation of this approach is that many of the metabolites in  
100 these environmentally relevant rich media could not be identified and presumably many others were not  
101 detected. For many exometabolite profiling experiments it would be desirable to have an environmentally  
102 relevant defined medium such that all of the metabolites are accounted for and the observed patterns of  
103 metabolite utilization are relevant to the field site.

104 Here we describe the construction of defined media for exometabolomics experiments based on  
105 untargeted analysis of metabolites from a specific soil sample of interest (Figure 1). Water extractable  
106 metabolites, referred to here as WEOC, were first qualitatively characterized using both liquid  
107 chromatography mass spectrometry (LC/MS) and gas chromatography mass spectrometry (GC/MS).  
108 From these data, a subset of metabolites was selected for absolute quantification to assist in formulating  
109 defined media that approximates the quality and quantities of metabolites within the soil. We evaluated  
110 the ability of the resulting media to support the growth of 30 phylogenetically diverse isolates from the  
111 Oak Ridge Field Research Center (ORFRC) and performed time series characterization of the substrate  
112 preferences of a single isolate.

113

## 114 **2 Methods and Materials**

### 115 **2.1 Chemicals**

116           Glucose (CAS 50-99-7) was from Amresco (Solon, OH). LC/MS-grade methanol (CAS 67-56-1)  
117 and water were from J.T. Baker (Avantor Performance Materials, Center Valley, PA). N-methyl-N-  
118 trimethylsilyltrifluoroacetamide (MSTFA) containing 1% trimethylchlorosilane (TMCS) was from Restek  
119 (Bellafonte, PA). Acetonitrile (CAS 75-05-8), adenosine (CAS 58-61-7), arabinose (CAS 28697-53-2),  
120 biotin (CAS 58-85-5), calcium chloride (CAS 10043-52-4), calcium pantothenate (CAS 137-08-6), cobalt  
121 nitrate (CAS 10026-22-9), d<sub>27</sub>-myristic acid (CAS 60658-41-5), ethylenediaminetetraacetic acid (EDTA;  
122 CAS 6381-92-6), folic acid (CAS 59-30-3), fructose (CAS 57-48-7), galactose (CAS 59-23-4), gamma-  
123 guanidinobutyric acid (CAS 463-00-3), guanine (CAS 73-40-5), hypoxanthine (CAS 68-94-0), iron  
124 sulfate (CAS 7782-63-0), magnesium sulfate (CAS 10034-99-8), maltitol (CAS 585-88-6), maltose (CAS  
125 6363-53-7), manganese sulfate (CAS 10034-96-5), mannose (CAS 3458-28-4), mannitol (69-65-8),  
126 methoxyamine (CAS 593-56-6), nicotinic acid (CAS 59-67-6), p-aminobenzoic acid (CAS 150-13-0),  
127 monobasic potassium phosphate (CAS 7778-77-0), pyridine (CAS 110-86-1), pyridoxine hydrochloride  
128 (CAS 58-56-0), raffinose (CAS 17629-30-0), riboflavin (CAS 83-88-5), rutinose (CAS 90-74-4), sodium  
129 chloride (CAS 7647-14-5), sucrose (CAS 57-50-1), thiamine (CAS 67-03-8), thiocetic acid (CAS 1077-28-  
130 7), trehalose dehydrate (CAS 6138-23-4), uridine (CAS 58-96-8), vitamin B12 (CAS 68-19-9), xylitol  
131 (CAS 87-99-0), xylobiose (CAS 6860-47-5), <sup>13</sup>C-<sup>15</sup>N-L-phenylalanine (CAS 878339-23-2) and amino  
132 acid kits #A6407 and A6282 were from Sigma-Aldrich (St. Louis, MO)

133

### 134 **2.2 Aqueous soil extraction and total organic carbon analysis**

135           Upper B-horizon soil was collected on September 24, 2013 from the background area of the  
136 ORFRC in Oak Ridge, Tennessee. Specifically, the collection site was located approximately 12 feet  
137 from groundwater well FW-300, in an area where grass, surface roots, and surface rocks were not  
138 abundantly present. To reduce the presence of debris and non-soil constituents from the soil sample, rocks  
139 and surface roots present on the surface, were physically removed prior to sampling. Surface soil was

140 collected by shoveling soil to a depth of 12-inches into sterile whirl pack bags, which were immediately  
141 stored on blue ice. The soil at this location is an unconsolidated saprolite with organic rich clay soil that  
142 ranges from 0.5-3 m approximating the depth of the root zone. Other soil properties including total  
143 nitrogen, oxidizable organic matter, cation exchange capacity, pH, and particle size were determined by  
144 the UC Davis Analytical Laboratory (Davis, CA).

145 Aqueous extraction was performed as previously described (Swenson et al., 2015b). Briefly, soil  
146 was lyophilized to dryness and sieved to 2 mm prior to 24 h chloroform fumigation (Vance, 1987). Six  
147 grams of soil were extracted in 24 mL of water at 4°C for 1 h while shaking on an orbital shaker (Orbital-  
148 Genie, Scientific Industries, Bohemia, NY). Tubes were then centrifuged at 4°C for 5 min at 4000 rpm.  
149 Supernatants were collected in fresh 50 mL conical tubes and centrifuged again after which supernatants  
150 were filtered through 0.45 µm syringe filters (Pall Acrodisc Supor membrane). These final WEOC  
151 samples were lyophilized to dryness in a Labconco Freezone 2.5 (Labconco, Kansas City, MO) and  
152 resuspended in water at a final equivalent concentration of 2 g soil/mL. WEOC with and without further  
153 1 kDa molecular weight cutoff (MWCO) filtration was analyzed for total organic carbon (TOC) by  
154 acidification and measurement of the non-purgeable organic carbon. WEOC samples were prepared as  
155 above, but at a final equivalent concentration of 1 g/mL (w/v of soil to water) and injected (50 µL) and  
156 run via an NPOC method using a Shimadzu (Kyoto, Japan) TOC-L series CSH/H-type TIC/TOC  
157 analyzer. Samples were individually mixed with a 1.5 % v/v of 1 M HCl for the conversion of inorganic  
158 carbon to CO<sub>2</sub> followed by a 2.5 minute purging time and combustion of the remaining organic carbon at  
159 an oven temperature of 680°C. The carrier gas used was synthetic air at a flow rate of 80 mL/min. Values  
160 reported for TOC are in ppm (µg C per mL extract).

161

### 162 **2.3 LC/Q-TOF Scan MS WEOC Profiling**

163 One hundred microliters of the WEOC extract was lyophilized in triplicate to dryness and  
164 resuspended in 100 µL of methanol containing internal standards 3,6-dihydroxy-4-methylpyridazine, 4-  
165 (3,3-dimethyl-ureido)benzoic acid and 9-anthracene carboxylic acid at 25 µM . Samples were separated

166 by hydrophilic interaction liquid chromatography (HILIC) on an Agilent 1290 UHPLC (Agilent  
167 Technologies, Santa Clara CA) using a Merck Sequant ZIC-pHILIC column (Merck KGaA, Darmstadt,  
168 Germany) of dimensions 150 x 2.1 mm and 4.6  $\mu\text{m}$  particle size. Two microliters of sample were injected  
169 with the following mobile phase: A- 5mM ammonium acetate; B- 9:1 acetonitrile: 50 mM ammonium  
170 acetate. The following gradient was used with a flow rate of 0.4 mL/min: 0.0-1.5min, 100% B; 25.0 min,  
171 50% B; 26.0-32.0 min, 35% B; 33.0-40.0 min, 100% B. The column temperature was set to 40°C and the  
172 autosampler was maintained at 4°C. Flow was directed to the electrospray ionization source of an Agilent  
173 6550 quadrupole time-of-flight (Q-TOF) mass spectrometer with the following settings for both positive  
174 and negative polarity ionization modes; drying gas temperature and flow 275°C and 14 L/min; sheath gas  
175 temperature and flow were 275°C and 9 L/min, respectively; nebulizer pressure was 30 psi; capillary  
176 voltage was 3500 V and nozzle voltage 1000 V. Mass spectra were acquired from 50 to 1700 m/z at 4  
177 spectra  $\text{s}^{-1}$ .

178

#### 179 **2.4 LC/Q-TOF Tandem MS Analysis**

180 Procedural blanks were used to generate exclusion lists of compounds and added to a data-  
181 dependent auto MS/MS method with a spectral scan range of 30-1200 amu and speed of 2 spectra  $\text{sec}^{-1}$ .  
182 The quadrupole was set to a narrow isolation width of 1.3 amu and the collision cell fixed to 10, 20 and  
183 40 eV. The auto MS/MS algorithm was restricted to a max of 4 precursor ions per MS/MS scan with a  
184 required precursor ion count threshold of 7,500 and a target of 50,000. Initial MS/MS spectra were then  
185 added within a retention time window of 0.25 min to the precursor exclusion list ensuring they were not  
186 selected for MS/MS in a subsequent run, a process that captured MS/MS spectra of low intensity  
187 precursor ions.

188

#### 189 **2.5 LC/QTOF-MS Data Analysis**

190 MassHunter Qualitative Analysis v.B.07.00 SP1 was used to query acquired scan data against a  
191 custom LC method specific accurate mass and retention time metabolite database based on acquired



192 authentic standard data. These initial metabolite identifications from scan MS data were augmented with  
193 tandem MS by searching at specific collision energies against spectral libraries such as METLIN (Smith  
194 et al., 2005), MassBank (Horai et al., 2010) and HMDB (Wishart et al., 2013). For metabolites only  
195 identified by LC/MS, the highest confidence identifications (ranked as “1” in Supplementary Table 1)  
196 required the unknown to be within 5 ppm m/z, 0.5 min retention time and to share dominant fragment  
197 ions with the standard. Lower confidence identifications matched standards in accurate mass and retention  
198 time but not fragmentation (or MS/MS was not obtained) and are ranked as a level “2” in Supplementary  
199 Table 1. For some metabolites, authentic standards were not available, but were identified based on  
200 matching fragmentation patterns with spectral libraries and are indicated by a level “3”.

201

## 202 **2.6 GC/MS WEOC metabolite profiling**

203 Sample extracts were dried and derivatized by oximation-silylation and data acquired by GC/MS  
204 as previously described (Swenson et al., 2015b). A C8-C30 fatty acid methyl ester ladder was added to  
205 each sample to enable orthogonal compound identification within a retention index window of +/- 20 with  
206 the electron ionization (EI) source of an Agilent 5977 GC/MS maintained at 70 eV for spectral library  
207 matching. Metabolite profiling data were deconvoluted using Unknowns Analysis v.B.07.00 from Agilent  
208 Technologies (Santa Clara, CA) followed by matching spectral fragmentation by quality score of 70 to the  
209 Agilent Fiehn GC/MS Metabolomics RTL Library (Kind et al., 2009). A set of sugar standards comprised  
210 of pentose, hexose, di-hexose and pentose alcohols (cellobiose, D-arabinose, D-arabinose, D-cellobiose,  
211 D-galactose, D-mannose, D-xylose, fructose, glucose, L-arabinose, maltitol, maltose, mannitol, mannose,  
212 raffinose, rutinose, sucrose, trehalose, xylitol and xylobiose) were used to resolve sugar pool composition  
213 for initial qualitative metabolite profiling and then prepared by single replicate at 1, 5, 10, 25 and 50  $\mu\text{M}$   
214 for determining sugar concentrations detected in the WEOC with  $\text{d}_{27}$ -myristic acid used as an internal  
215 standard at a concentration of 25  $\mu\text{M}$  (Supplementary Figure 1A). Quantitative data analysis was done  
216 using Agilent MassHunter Quantitative Analysis v.B.07.00. GC/MS identifications are provided in  
217 Supplementary Table 1.

218

## 219 **2.7 LC/QQQ-MS for metabolite quantitation**

220 For LC/MS-analyzed metabolites, quantitative assays were performed on an Agilent 6460 triple  
221 quadrupole (QQQ) MS (Agilent Technologies, Santa Clara CA) using the same LC, column and ESI  
222 source conditions as described for Q-TOF MS analysis. Authentic standards were prepared for amino  
223 acids, nucleobases and nucleosides for a subset of metabolites identified in the WEOC to generate  
224 compound specific transitions. Multiple reaction monitoring (MRM) transitions were scheduled by  
225 retention time segment as established using Agilent Optimizer v.B.07.00 and are provided in  
226 Supplementary Table 1. For the amino acid assay, a standard mix (Sigma-Aldrich amino acid standards  
227 kit, product#A6407, A6282) was diluted to concentrations of 0.1, 0.5, 1 and 10  $\mu\text{g}/\text{mL}$  and run as single  
228 replicates (Supplementary Figure 1B). For the nucleotide/nucleobase assay, authentic standards were  
229 prepared at 1, 5, 10 and 25  $\mu\text{M}$  concentrations in triplicate with  $^{13}\text{C}$ -phenylalanine used as an internal  
230 standard at 25  $\mu\text{M}$  (Supplementary Figure 1C). Soil extracts were then run at a concentration of 2 g/ml  
231 (soil/water) for determining concentrations of these metabolites. Quantitative data analysis was performed  
232 using Agilent MassHunter Quantitative Analysis version B.07.00. For each metabolite, quantitative data  
233 (mg/mL for each metabolite) are converted to carbon ppm based on the percent weight carbon within each  
234 metabolite and are reported as  $\text{mg kg}^{-1}$  extracted soil.

235

## 236 **2.8 Formulation of soil defined media and comparison of growth of 30 phylogenetically diverse**

### 237 **ORFRC isolates**

238 Soil defined medium 1 (SDM1) was prepared by adding 23 metabolites quantified from WEOC  
239 (Section 2.3) at the observed absolute concentrations, to a base media composed of 1x Wolfe's mineral  
240 and 1x Wolfe's vitamin solutions, potassium phosphate and ammonium chloride (Table 1). For soil  
241 defined medium 2 (SDM2), the number of metabolites was expanded to 46 to include additional  
242 observed, but not quantified WEOC compounds. These additional metabolites were added to the medium  
243 at the lowest concentration of a quantified metabolite within the same class (Supplemental Table 1). SDM

244 (both at 1x and 10x concentrations) were compared to R2A medium at 1x concentration (Tecknova,  
245 Hollister CA) in their ability to support the growth of a broad range of ORFRC isolates. An existing  
246 collection of 30 phylogenetically diverse isolates from the ORFRC site were revived in liquid R2A from  
247 frozen glycerol stocks. DNA was obtained from overnight cultures to verify 16S rDNA based  
248 identifications. Aliquots were washed (3 times) prior to inoculation into 96-well microtitre plates. For  
249 each fresh medium, 20 uL of starter culture was added to 180 uL and plates were incubated under aerobic  
250 conditions for 110 h at 28°C, and shaken at 365 rpm. To facilitate growth monitoring, starting volumes of  
251 each isolate were normalized (200 uL total). Growth data were collected by measuring OD<sub>600</sub> on a BioTek  
252 Eon Microplate Spectrophotometer at 15 min intervals.

253

## 254 **2.9 Time series exometabolomics analysis with *Pseudomonas sp.* FW300-N2E2**

255 Using SDM1-10x liquid medium, triplicate 2 ml cultures (including media and water blank  
256 controls) of *Pseudomonas sp.* FW300-N2E2, a bacterial isolate from the ORFRC (16S rDNA sequencing  
257 closest to *Pseudomonas corrugata* strain P94- EF153018.1; Thorgersen et al. (2015)) were prepared in  
258 24-well spectrophotometer plates using the inoculation technique described in 2.8. Time points were  
259 sampled early/mid log phase (3,6 hours) early/late stationary phase (9,12 hours) and finally at 24 h  
260 (Supplementary Figure 2). Culture fractions were removed for LC/MS and GC/MS analysis at 0.5 and 0.2  
261 mL volumes, respectively, and centrifuged in a Savant centrifuge (Thermo Scientific, San Jose CA) for 5  
262 min at 5000 rpm and the resultant supernatant filtered through 0.2 µm centrifugal filters (Pall  
263 Corporation, Port Washington NY) for 5 min at 10000 rpm. Filtrates were then frozen at -80 °C,  
264 lyophilized to dryness with LC/MS samples resuspended in 100 µL methanol containing 25 µM of the  
265 internal standards and analyzed as described in 2.3. GC/MS samples were derivatized and also analyzed  
266 as described in 2.6.

267

## 268 **3 Results**

### 269 **3.1 Soil properties**

270 The TOC of the WEOC was 129.1 ppm (or 129.1 mg C kg<sup>-1</sup> soil). Other physical properties of the  
271 ORFRC soil were: total N of 0.08%, organic matter (oxidizable) content of 1.5%, cation exchange  
272 capacity of 14.5 meq/100 g, soil pH of 7.7 and particle size (% sand/silt/clay) of 29/54/17.

273

### 274 **3.2 Integrating GC/MS with LC/MS to analyze soil WEOC composition and concentrations**

275 In order to expand on GC/MS WEOC annotations and composition previously reported (Swenson  
276 et al., 2015b) this approach was complemented with HILIC LC/MS (Swenson et al., 2015a). Using both  
277 approaches here, a total of 96 water extractable soil metabolites were identified representing multiple  
278 classes of compounds such as amino acids, amino acid derivatives, mono- and di-carboxylic acids,  
279 nucleobases, nucleosides, osmolytes, sugars, sugar acids and sugar alcohols. Using LC/MS, 85  
280 metabolites were identified (Supplementary Table 1) with 66 of these confirmed by analytical standards.  
281 Eighteen of the metabolites identified using LC/MS were also identified by GC/MS. In addition, there  
282 were 11 metabolites identified using GC/MS that were not detected by LC/MS. Sugars were best  
283 chromatographically resolved by GC/MS versus LC/MS. Using authentic standards, this sugar pool was  
284 found to be comprised of hexoses (glucose, fructose, arabinose, mannose), dihexoses (trehalose, maltose)  
285 and the sugar alcohol mannitol.

286 Quantitative methods were developed for 36 compounds representing the biochemical classes  
287 with the most abundant MS ion signal (amino acids, sugars, nucleobases and nucleosides). LC triple  
288 quadrupole MS was used for quantification of amino acids, nucleobases and nucleosides while sugars  
289 were quantified by GC/MS. Of these 36 quantified metabolites, 25 were within the quantifiable (linear)  
290 range (Supplementary Table 1). Converting the metabolite concentrations into carbon concentrations,  
291 these 25 metabolites together accounted for a total of 20.0 mg C kg<sup>-1</sup> soil with sugars accounting for  
292 89.2% of the quantified metabolites. Trehalose, glucose, mannitol, fructose and maltose each accounted  
293 for 5.3, 5.0, 3.2, 2.7, 1.2 mg C kg<sup>-1</sup> soil respectively (Supplementary Table 1). Of the remainder, 9.8%  
294 were amino acids and only 0.8% were nucleobases and nucleosides.

295

### 296 **3.3 Molecular weight cutoff filtration and TOC quantitation of WEOC**

297 Since the metabolomic methods used here would not be expected to detect all WEOC  
298 components, molecular weight cutoff filtration was used to help estimate the fraction of the WEOC pool  
299 quantified by MS. The TOC of the initial soil WEOC was 129.1 mg C kg<sup>-1</sup> soil, which, after filtration  
300 through 1 kDa filters, was reduced to 53.3 mg C kg<sup>-1</sup> soil. This reduction in TOC is consistent with the  
301 removal of biopolymers, colloids, trace lignin and cellulosic debris. Based on these TOC data, the 25  
302 metabolites that were quantified from the WEOC, accounting for 20.0 mg C kg<sup>-1</sup> soil, represented  
303 approximately 15.5% of the initial WEOC fraction and 37.5% of the <1 kDa filtered fraction.

304

### 305 **3.4 Comparison of soil defined media and growth of bacterial isolates**

306 Based on soil WEOC data, two soil defined media (SDM) were formulated. The first (SDM1)  
307 was based on 23 abundant (quantified) WEOC metabolites (Table 1). The second (SDM2) contained  
308 twice as many compounds (Supplementary Table 2) to determine if expanding the number of metabolites  
309 present in SDM supported additional growth of bacterial isolates. These additional metabolites (including  
310 many amino acids, nucleobases and nucleosides) were detected in the soil WEOC, but were not  
311 quantified. Because of this, they were added at the lowest concentration of a quantified metabolite within  
312 the same class. For both SDM1 and SDM2, added metabolites served as microbial carbon sources and  
313 were supplemented with 1x Wolfe's vitamins and 1x Wolfe's mineral solutions (Table 1).

314 A broad assessment was then performed to compare the viability of these two media, at two  
315 different concentrations, with 30 native ORFRC bacterial isolates (Figure 2). In order to benchmark the  
316 viability of these media, isolate growth was also compared to the isolation medium, R2A, which  
317 supported the growth of all 30 isolates. At 1x concentrations, SDM1 was able to support the growth of 11  
318 isolates and at 10x SDM1 supported the growth of 13 isolates. While only five isolates grew on 1x  
319 SDM2, excitingly, 25 isolates grew on this medium at 10x concentration (Figure 2 and Supplementary  
320 Table 3).

321

### 322 **3.5 Isolate exometabolomics analysis using SDM1**

323 Time-series exometabolomics studies can help delineate substrate preference of isolates as an  
324 additional measure of resource partitioning. Since SDM1 appeared to be a simple, yet viable medium for  
325 many isolates, this medium was selected to test its suitability for exometabolomics. *Pseudomonas sp.*  
326 FW300-N2E2 was grown in SDM1-5x and samples were collected at 3, 6, 9 and 12 h for targeted  
327 exometabolomics analysis by LC/QQQ-MS and GC/MS as described. Distinct patterns of substrate  
328 depletion were observed as shown in Figure 3. Compounds such as arginine, proline, glutamic acid,  
329 guanine and hypoxanthine were already depleted by the first time point of 3 h. During later exponential  
330 growth phase (6 and 9 h), a second pool of compounds were depleted including alanine, isoleucine,  
331 gamma-guanadinobutyric acid, glycine, leucine, lysine, phenylalanine, serine and threonine. Interestingly,  
332 presumably high value substrates were not depleted until stationary phase with glucose detected up to 12  
333 h and mannose and fructose up to the final 24 h sampling. Several metabolites persisted at near initial  
334 concentrations for the duration of the experiment including the abundant dihexoses trehalose and maltose,  
335 the hexose arabinose, the sugar alcohol mannitol and the nucleoside uridine.

336

## 337 **4 Discussion**

### 338 **4.1 Integrating qualitative GC/MS with LC/QTOF-MS to analyze WEOC composition**

339 The objective of this study was to develop a viable and relevant defined media based on  
340 metabolomics analyses of an environment of interest to enable exometabolomic characterization of isolate  
341 resource partitioning. Here we combined two metabolomics approaches, GC/MS (Swenson et al., 2015b)  
342 and HILIC LC/MS (Swenson et al., 2015a) for qualitative and quantitative analysis. In total, 96  
343 metabolites were identified using a combination of authentic standards, MS/MS and spectral library  
344 matching (Supplementary Table 1).

345 While this work focused on a single soil for the development of a metabolomics workflow for  
346 defined media preparation, it is informative to see how our metabolites detected lie within the context of  
347 other soil metabolomics studies. Overall, the range of metabolite classes detected, including amino acids,

348 amino acid derivatives, mono- and di-carboxylic acids, nucleobases, nucleosides, osmolytes, sugars, sugar  
349 acids and sugar alcohols are consistent across many soil studies. The detection of trehalose and other  
350 compatible solutes (betaine and proline betaine) as well as additional quaternary ammonium compounds  
351 (acetylcarnitine, carnitine and choline) have been reported for other soils (Baran et al., 2013; Warren,  
352 2014; Bouskill et al., 2016). Metabolites such as acetylcarnitine, citrulline, cytosine, gamma-aminobutyric  
353 acid and nicotinic acid are consistent with a key finding from Warren (2013) who showed that a diverse  
354 pool of nonpeptide organic N exists in soils.

355         The pool of organic acids in our WEOC samples was found to be diverse, composed of aliphatic  
356 di-carboxylic acids (malic, maleic, succinic) and aromatic carboxylic acids (benzoic, salicylic and  
357 shikimic). This is consistent with the observation of these low molecular weight carboxylic acids in many  
358 soils as reviewed by Strobel (2001) and the ability of aqueous shaking extraction to desorb higher  
359 concentrations of these metabolites than solution displacement techniques such as lysimeter collection or  
360 soil centrifugation. Our samples, which originated from an upper B horizon subsoil, may be associated  
361 with limited amounts of aliphatic mono-carboxylic acids (not detected in our WEOC extracts) potentially  
362 due to rapid microbial turnover of these compounds. Furthermore, the di-carboxylic and aromatic  
363 carboxylic acids that were detected here may be associated with a limited nutrient pool *in situ* that became  
364 desorbed during the aqueous shaking extraction (Strobel, 2001).

365

#### 366 **4.2. Analyzing the TOC content of soil WEOC**

367         The TOC level observed in our soil WEOC (129.1 mg C kg<sup>-1</sup> soil) was found to be consistent  
368 with many previous reports on soil DOC, noting that differences in soil types and extraction methods may  
369 dramatically affect these values. With this caveat, our TOC level is close to the 146 ppm reported for a  
370 soil (leachate) solution from a eutric cambisol grassland (Jones and Willett (2006). However, this study  
371 displays the affect of extraction techniques on these values by reporting lower TOC values (55-70 mg kg<sup>-1</sup>  
372 soil) for the same soil following aqueous shaking (rather than leachate collection). Another study that is  
373 consistent with our TOC results focused on evaluating dissolved organic matter dynamics in Greek

374 vineyard soils (Christou et al., 2005). They report drastic seasonal variation of DOC levels in soil  
375 solutions ranging from approximately 100-400 ppm over a 12 month period (Christou et al., 2005) and  
376 displayed substantial differences between topsoil and subsoil with WEOC levels decreasing from 89 to 58  
377 mg C kg<sup>-1</sup> soil (Christou et al., 2006).

378         Since soluble polymers and small particles presumably account for a large fraction of the WEOC,  
379 we wanted to determine the fraction of this total carbon pool accounted for by the 25 quantified  
380 metabolites. The TOC level of the soil WEOC was found to be reduced by more than half (129.1 ppm to  
381 53.3 ppm) following 1 kDa filtration. Since microbes are limited in their ability to directly uptake  
382 macromolecules and are dependent on extracellular deconstruction followed by transporting the resulting  
383 metabolites, these molecules smaller than 1 kDa likely represent the most directly accessible fraction of  
384 the WEOC for microbes. This fraction is most relevant to our metabolomics methods given that that one  
385 operational definition of metabolites is molecules less than <1 kDa (Holmes et al., 2008).

386

### 387 **4.3. Characterizing the LMWOS fraction of WEOC by quantitative LC/QQQ-MS and GC/MS** 388 **analysis**

389         Based on the molar concentrations of the 25 quantified metabolites in the WEOC (consisting  
390 mostly of carbohydrates and amino acids) and the number of carbons in each metabolite, we determined  
391 that these quantified metabolites accounted for 20.0 mg C kg<sup>-1</sup> in the soil sample. This represents 15.5%  
392 of the WEOC and 37.5% of the < 1 kDa metabolite pool, indicating that even using two highly-sensitive  
393 analytical approaches, the majority of soil metabolites remain rare, unidentified or undetected. Numerous  
394 other studies support this assertion of the many unannotated chemical features present in soil LMWOS  
395 (Ohno, et al., 2010; Warren 2013; Baran et al., 2015) highlighting the value of using defined metabolite  
396 mixtures for exometabolomic characterization of microbial resource use.

397         The soil metabolites that we detected have a very uneven abundance distribution. Specifically, of  
398 the quantified metabolites, sugars represented approximately 89.2% of the quantified metabolite TOC  
399 pool, with a single metabolite, trehalose accounting for 5.3 mg C kg<sup>-1</sup> soil (29.7% of the quantified sugar



400 TOC pool and 9.9% of the < 1 kDa WEOC). Of the amino acids, only alanine, valine, leucine and  
401 isoleucine were at levels above 200  $\mu\text{g C kg}^{-1}$  soil while all nucleosides and nucleobases except for  
402 uridine were at trace levels at or below 50  $\mu\text{g C kg}^{-1}$  soil. While this type of metabolite distribution is  
403 specific to the ORFRC soil, we can compare these values with previous reports. Where we found total  
404 quantified amino acids to be 4.08  $\text{mg kg}^{-1}$  soil, Fischer et al. (2007) examined the composition of Haplic  
405 Luvisol soil leachate and reports an amino acid content of 281.1  $\mu\text{g kg}^{-1}$  soil, considerably lower than  
406 ours, though with a similar ranked composition (*e.g.* alanine, leucine and isoleucine ranked among the  
407 highest)(Fischer et al., 2007). We found the ratio of carbohydrates to amino acids to be 10.8 (g/g; more  
408 carbohydrates), which is consistent with Hertenberger et al (2002) who reports ratios ranging from 6.4-  
409 17.4, but Fisher et al. (2007) reports 0.4 (more amino acids). While these differences may simply be due  
410 to actual differences between soils, bias introduced during extraction is likely another important factor.  
411 For example extraction techniques range from mild soil leaching used by Fisher et al (Fischer et al.,  
412 2007) to the fumigation-aqueous extraction (this study) to a more aggressive acetone-water extraction  
413 used by Hertenberger et al. (2002).

414

#### 415 **4.4. Preparation and evaluation of defined media based on soil WEOC composition**

416 SDM1, which contained 23 abundant WEOC metabolites, was found to support the growth of 13  
417 out of the 30 isolates tested. Doubling the number of metabolites in the media (SDM2) dramatically  
418 increased the number of isolates that grew (25 out of 30) demonstrating similar viability to the widely  
419 used rich R2A media. Interestingly however, at reduced concentrations (1x), SDM1 supported growth of  
420 more isolates compared to SDM2. It could be that at 1x concentrations, SDM1 has a more optimal carbon  
421 concentration or C:N than SDM2, but at 10x concentrations, metabolite-specific transporters become  
422 active, promoting the survival in the more rich SDM2 (Button, 1993). While, the medium R2A was still  
423 more viable than the both SDM, this is not surprising given that the bacterial isolates analyzed here were

424 isolated using R2A. Furthermore, R2A is rich in amino acids and peptides while SDM1 and SDM2 have a  
425 high sugar content, indicating potential unique and developed substrate preferences of these bacteria.

426         The application of SDM1 to investigate the substrate preferences of *Pseudomonas sp.* FW300-  
427 N2E2 revealed an interesting pattern of substrate utilization. We observed rapid depletion of arginine,  
428 glutamate, proline and guanine and hypoxanthine by the 3 h timepoint associated with the onset of  
429 logarithmic growth followed by consumption of alanine, isoleucine, gamma-guanadinobutyric acid,  
430 glycine, leucine, lysine, phenylalanine, serine and threonine (depleted by 6 h) then finally depletion of  
431 sugars including glucose. Several sugars such as arabinose, maltose, mannitol and trehalose were not used  
432 at all suggesting that this microbe may lack a sufficient set of transporters to use these abundant  
433 resources, supporting the view that it is important to perform exometabolomics experiments on media  
434 relevant, whenever possible, to their native environment. The utilization profile of this *Pseudomonas sp.*  
435 is consistent with a previous report for *Pseudomonas aeruginosa* PAO1 in which growth on a complex  
436 tryptone medium resolved an initial preference for select amino acids including leucine, proline, serine  
437 and threonine while the carbohydrate utilization was very similar to our results, namely, while glucose  
438 was metabolized, maltose, mannitol, mannose and trehalose were not (Frimmersdorf, Horatzek et al.  
439 2010). Since, *Pseudomonas sp.* FW300-N2E2 was isolated using R2A, which is rich in many of the  
440 preferentially consumed compounds (such as amino acids) perhaps it is not surprising that it preferentially  
441 uses resources that, while relatively rare in the soil environment, are abundant in the isolation medium.  
442 We anticipate that media prepared based on soil metabolite analyses may have additional utility for  
443 isolating organisms that utilize the major measurable carbon sources within those environments.

444         The success of SDM demonstrates the ability to use soil metabolomics to develop defined media  
445 based on metabolites known to be abundant in soils and at concentrations relevant to the native  
446 environment. This also indicates the potential, in agreement with previous approaches, of using single or  
447 complex amendment of minimal media to isolate previously unculturable soil bacteria (Sait et al., 2002;  
448 Joseph et al., 2003). The approach used here is especially important for exometabolite profiling studies.  
449 Specifically, microbial transport and regulatory systems, particularly catabolite repression, are responsive

450 to the absolute concentrations of metabolites in the environment. Thus, evaluating substrate utilization in  
451 defined media relevant to their habitat can greatly improve exometabolomic studies. There are a number  
452 of challenges associated with creating media that reflect microbial habitats for laboratory experimentation  
453 must be considered. Specifically, bulk analysis of soil no doubt creates averaged metabolite compositions  
454 unlike any particular niche within the soil. In addition, as we have shown here, many metabolites cannot  
455 be identified or go undetected. Complementing mass spectrometry with other types of spectroscopy, such  
456 as NMR, may help address this. Finally, due to the extreme heterogeneity between and within soil  
457 ecosystems, our particular findings on soil metabolite abundances should not be generalized except for  
458 the dozen or so metabolites that we have found to be consistent with other reports.

459

#### 460 **4.5. Implications for other environments**

461         These methods, using exometabolomics analysis of environmental samples to prepare defined  
462 media for the study of organisms from that environment, are likely applicable to a diversity of  
463 environments. Extension of this approach to diverse soil types offers both the exciting possibility of  
464 helping connect soil metabolite composition to soil microbial community composition and development  
465 of generalizable defined soil media. While these defined media were focused on carbon, an important  
466 extension would be to also account for other critical elements especially organic nitrogen and phosphorus.  
467 The great advantage of these defined media is that they enable quantitative analysis of resource utilization  
468 by soil microorganisms.

469         One exciting implication of this analysis is that rare metabolites that were not analyzed may  
470 together account for a significant portion of the carbon (WEOC) in this sample, similar to how rare  
471 microbes collectively account for a large portion of microbiomes. Synthesis of this view with previous  
472 results showing that microbes from this soil (and biological soil crusts) utilize largely non-overlapping  
473 metabolites suggests there is coupling between microbial diversity and soil metabolite diversity. These  
474 results showing the unevenness of water soluble metabolites may further support the traditional view of  
475 copiotrophic and oligotrophic organisms. Specifically, there are a low-diversity of organisms competing

476 for the abundant resources (copiotrophs) and a high diversity of rare organisms using low-abundance  
477 substrates (Upton and Nedwell, 1989; Konopka et al., 1998). It should be emphasized that this is highly  
478 speculative and studies of multiple soil samples and multiple sites would be required to support  
479 generalization to both this particular site and to soils in general.

480

## 481 **5. Conclusion**

482 This study used soil metabolomic analyses to characterize the low molecular weight organic  
483 matter composition to formulate defined media intended to approximate the qualitative and quantitative  
484 composition of microbe bioavailable carbon from a specific study site. Composition and carbon  
485 concentrations were found to align well with related studies with these soil metabolites having a very  
486 uneven quantitative distribution (e.g. trehalose accounting for 9.9% of the <1 kDa WEOC fraction),  
487 analogous to the uneven soil microbial community structure. The defined media that were synthesized to  
488 reflect the soil WEOC composition were found to support the growth of 13 or 25 (for SDM1 and SDM2,  
489 respectively) out of 30 phylogenetically diverse isolates. A detailed study of a single isolate,  
490 *Pseudomonas sp.* FW300-N2E2 showed that this isolate rapidly depleted guanine, serine, leucine and  
491 hypoxanthine while several metabolites including the most abundant disaccharides were not utilized from  
492 SDM1. We anticipate that this approach of preparing environmentally relevant defined media will be  
493 applicable to diverse environments to enable more ecologically relevant isolation and examination of  
494 microbial substrate utilization.

495

## 496 **Acknowledgements**

497 The authors gratefully acknowledge funding from Ecosystems and Networks Integrated with  
498 Genes and Molecular Assemblies (<http://enigma.lbl.gov>), a Scientific Focus Area Program at Lawrence  
499 Berkeley National Laboratory for the U.S. Department of Energy, Office of Science, Office of Biological  
500 and Environmental Research under contract number DE-AC02-05CH11231.

## 501 **REFERENCES**

502 Baran, R., Bowen, B.P., Price, M.N., Arkin, A.P., Deutschbauer, A.M., Northen, T.R., 2013. Metabolic  
503 footprinting of mutant libraries to map metabolite utilization to genotype. *ACS Chem Biol* 8, 189-199.  
504

505 Baran, R., Brodie, E.L., Mayberry-Lewis, J., Hummel, E., Da Rocha, U.N., Chakraborty, R., Bowen,  
506 B.P., Karaoz, U., Cadillo-Quiroz, H., Garcia-Pichel, F., Northen, T.R., 2015. Exometabolite niche  
507 partitioning among sympatric soil bacteria. *Nat Commun* 6, 8289.  
508

509 Bouskill, N.J., Wood, T.E., Baran, R., Ye, Z., Bowen, B.P., Lim, H., Zhou, J., Nostrand, J.D., Nico, P.,  
510 Northen, T.R., Silver, W.L., Brodie, E.L., 2016. Belowground Response to Drought in a Tropical Forest  
511 Soil. I. Changes in Microbial Functional Potential and Metabolism. *Front Microbiol* 7, 525.  
512

513 Boyer, J.N., Groffman, P.M., 1996. Bioavailability of water extractable organic carbon fractions in forest  
514 and agricultural soil profiles. *Soil Biology and Biochemistry* 28, 783-790.  
515

516 Butler, J.L., Williams, M.A., Bottomley, P.J., Myrold, D.D., 2003. Microbial Community Dynamics  
517 Associated with Rhizosphere Carbon Flow. *Appl Environ Microbiol* 69, 6793-6800.  
518

519 Button, D.K., 1993. Nutrient-limited microbial growth kinetics: overview and recent advances. *Antonie*  
520 *Van Leeuwenhoek* 63, 225-235.  
521

522 Christou, M., Avramides, E.J., Jones, D.L., 2006. Dissolved organic nitrogen dynamics in a  
523 Mediterranean vineyard soil. *Soil Biology and Biochemistry* 38, 2265-2277.  
524

525 Christou, M., Avramides, E.J., Roberts, J.P., Jones, D.L., 2005. Dissolved organic nitrogen in contrasting  
526 agricultural ecosystems. *Soil Biology and Biochemistry* 37, 1560-1563.  
527

528 Fernandes, M.F., Saxena, J., Dick, R.P., 2013. Comparison of whole-cell fatty acid (MIDI) or  
529 phospholipid fatty acid (PLFA) extractants as biomarkers to profile soil microbial communities. *Microb*  
530 *Ecol* 66, 145-157.  
531

532 Ferrari, B.C., Winsley, T., Gillings, M., Binnerup, S., 2008. Cultivating previously uncultured soil  
533 bacteria using a soil substrate membrane system. *Nat Protoc* 3, 1261-1269.  
534

535 Fischer, H., Meyer, A., Fischer, K., Kuzyakov, Y., 2007. Carbohydrate and amino acid composition of  
536 dissolved organic matter leached from soil. *Soil Biology and Biochemistry* 39, 2926-2935.  
537

538 Guigue, J., Mathieu, O., Lévêque, J., Mounier, S., Laffont, R., Maron, P.A., Navarro, N., Chateau, C.,  
539 Amiotte-Suchet, P., Lucas, Y., 2014. A comparison of extraction procedures for water-extractable organic  
540 matter in soils. *European Journal of Soil Science* 65, 520-530.  
541

542 Haney, R.L., Franzluebbers, A.J., Jin, V.L., Johnson, M.-V., Haney, E.B., White, M.J., Harmel, R.D.,  
543 2012. Soil Organic C:N vs. Water-Extractable Organic C:N. *Open Journal of Soil Science* 02, 269-274.  
544

545 Hertenberger, G., Zampach, P., Bachmann, G., 2002. Plant species affect the concentration of free sugars  
546 and free amino acids in different types of soil. *Journal of Plant Nutrition and Soil Science* 165, 557-565.  
547

548 Holmes, E., Wilson, I.D., Nicholson, J.K., 2008. Metabolic phenotyping in health and disease. *Cell* 134,  
549 714-717.  
550

551 Horai, H., Arita, M., Kanaya, S., Nihei, Y., Ikeda, T., Suwa, K., Ojima, Y., Tanaka, K., Tanaka, S.,  
552 Aoshima, K., Oda, Y., Kakazu, Y., Kusano, M., Tohge, T., Matsuda, F., Sawada, Y., Hirai, M.Y.,  
553 Nakanishi, H., Ikeda, K., Akimoto, N., Maoka, T., Takahashi, H., Ara, T., Sakurai, N., Suzuki, H.,

554 Shibata, D., Neumann, S., Iida, T., Tanaka, K., Funatsu, K., Matsuura, F., Soga, T., Taguchi, R., Saito,  
555 K., Nishioka, T., 2010. MassBank: a public repository for sharing mass spectral data for life sciences. *J*  
556 *Mass Spectrom* 45, 703-714.  
557  
558 Jones, D., Willett, V., 2006. Experimental evaluation of methods to quantify dissolved organic nitrogen  
559 (DON) and dissolved organic carbon (DOC) in soil. *Soil Biology and Biochemistry* 38, 991-999.  
560  
561 Joseph, S.J., Hugenholtz, P., Sangwan, P., Osborne, C.A., Janssen, P.H., 2003. Laboratory Cultivation of  
562 Widespread and Previously Uncultured Soil Bacteria. *Appl Environ Microbiol* 69, 7210-7215.  
563  
564 Kind, T., Wohlgemuth, G., Lee do, Y., Lu, Y., Palazoglu, M., Shahbaz, S., Fiehn, O., 2009. FiehnLib:  
565 mass spectral and retention index libraries for metabolomics based on quadrupole and time-of-flight gas  
566 chromatography/mass spectrometry. *Anal Chem* 81, 10038-10048.  
567  
568 Konopka, A., Oliver, L., Jr, R.F.T., 1998. The Use of Carbon Substrate Utilization Patterns in  
569 Environmental and Ecological Microbiology. *Microb Ecol* 35, 103-115.  
570  
571 Liebeke, M., Lalk, M., 2014. Staphylococcus aureus metabolic response to changing environmental  
572 conditions - a metabolomics perspective. *Int J Med Microbiol* 304, 222-229.  
573  
574 Ling, L.L., Schneider, T., Peoples, A.J., Spoering, A.L., Engels, I., Conlon, B.P., Mueller, A., Schaberle,  
575 T.F., Hughes, D.E., Epstein, S., Jones, M., Lazarides, L., Steadman, V.A., Cohen, D.R., Felix, C.R.,  
576 Fetterman, K.A., Millett, W.P., Nitti, A.G., Zullo, A.M., Chen, C., Lewis, K., 2015. A new antibiotic kills  
577 pathogens without detectable resistance. *Nature* 517, 455-459.  
578

579 Miller, A., Schimel, J., Meixner, T., Sickman, J., Melack, J., 2005. Episodic rewetting enhances carbon  
580 and nitrogen release from chaparral soils. *Soil Biology and Biochemistry* 37, 2195-2204.  
581

582 Ohno, T., He, Z., Sleighter, R. L., Honeycutt, C. W., Hatcher, P. G., 2010. Ultrahigh resolution mass  
583 spectrometry and indicator species analysis to identify marker components of soil- and plant biomass-  
584 derived organic matter fractions. *Environ Sci Technol* 44, 8594-8600.  
585

586 Ohno, T., Parr, T.B., Gruselle, M.C., Fernandez, I.J., Sleighter, R.L., Hatcher, P.G., 2014. Molecular  
587 composition and biodegradability of soil organic matter: a case study comparing two new England forest  
588 types. *Environ Sci Technol* 48, 7229-7236.  
589

590 Pham, V.H., Kim, J., 2012. Cultivation of unculturable soil bacteria. *Trends Biotechnol* 30, 475-484.  
591

592 Reasoner, D.J., Geldreich, E.E., 1985. A new medium for the enumeration and subculture of bacteria  
593 from potable water. *Appl Environ Microbiol* 49, 1-7.  
594

595 Sait, M., Hugenholtz, P., Janssen, P.H., 2002. Cultivation of globally distributed soil bacteria from  
596 phylogenetic lineages previously only detected in cultivation-independent surveys. *Environ Microbiol* 4,  
597 654-666.  
598

599 Schimel, J.P., Mikan, C., 2005. Changing microbial substrate use in Arctic tundra soils through a freeze-  
600 thaw cycle. *Soil Biology and Biochemistry* 37, 1411-1418.  
601

602 Schmidt, M.W., Torn, M.S., Abiven, S., Dittmar, T., Guggenberger, G., Janssens, I.A., Kleber, M.,  
603 Kogel-Knabner, I., Lehmann, J., Manning, D.A., Nannipieri, P., Rasse, D.P., Weiner, S., Trumbore, S.E.,  
604 2011. Persistence of soil organic matter as an ecosystem property. *Nature* 478, 49-56.



605

606 Smith, C.A., O'Maille, G., Want, E.J., Qin, C., Trauger, S.A., Brandon, T.R., Custodio, D.E., Abagyan,

607 R., Siuzdak, G., 2005. METLIN: a metabolite mass spectral database. *Ther Drug Monit* 27, 747-751.

608

609 Strobel, B.W., 2001. Influence of vegetation on low-molecular-weight carboxylic acids in soil solution—

610 a review. *Geoderma* 99, 169-198.

611

612 Svenning, M.M., Wartainen, I., Hestnes, A.G., Binnerup, S.J., 2003. Isolation of methane oxidising

613 bacteria from soil by use of a soil substrate membrane system. *FEMS Microbiology Ecology* 44, 347-354.

614

615 Swenson, T.L., Bowen, B.P., Nico, P.S., Northen, T.R., 2015a. Competitive sorption of microbial

616 metabolites on an iron oxide mineral. *Soil Biology and Biochemistry* 90, 34-41.

617

618 Swenson, T.L., Jenkins, S., Bowen, B.P., Northen, T.R., 2015b. Untargeted soil metabolomics methods

619 for analysis of extractable organic matter. *Soil Biology and Biochemistry* 80, 189-198.

620

621 Thorgersen, M.P., Lancaster, W.A., Vaccaro, B.J., Poole, F.L., Rocha, A.M., Mehlhorn, T., Pettenato, A.,

622 Ray, J., Waters, R.J., Melnyk, R.A., Chakraborty, R., Hazen, T.C., Deutschbauer, A.M., Arkin, A.P.,

623 Adams, M.W., 2015. Molybdenum Availability Is Key to Nitrate Removal in Contaminated Groundwater

624 Environments. *Appl Environ Microbiol* 81, 4976-4983.

625

626 Tucker, C.L., Young, J.M., Williams, D.G., Ogle, K., 2014. Process-based isotope partitioning of winter

627 soil respiration in a subalpine ecosystem reveals importance of rhizospheric respiration. *Biogeochemistry*

628 121, 389-408.

629

630 Upton, A.C., Nedwell, D.B., 1989. Nutritional flexibility of oligotrophic and copiotrophic Antarctic  
631 bacteria with respect to organic substrates. *FEMS Microbiol Lett* 62, 1-6.  
632  
633 Vance, E.D., Brookes, P.C., Jenkinson, D.S., 1987. An extraction method for measuring soil microbial  
634 biomass C. *Soil Biology and Biochemistry* 19, 703-707.  
635  
636 Warren, C.R., 2013. High diversity of small organic N observed in soil water. *Soil Biology and*  
637 *Biochemistry* 57, 444-450.  
638  
639 Warren, C.R., 2014. Response of osmolytes in soil to drying and rewetting. *Soil Biology and*  
640 *Biochemistry* 70, 22-32.  
641  
642 Wishart, D.S., Jewison, T., Guo, A.C., Wilson, M., Knox, C., Liu, Y., Djoumbou, Y., Mandal, R., Aziat,  
643 F., Dong, E., Bouatra, S., Sinelnikov, I., Arndt, D., Xia, J., Liu, P., Yallou, F., Bjorndahl, T., Perez-  
644 Pineiro, R., Eisner, R., Allen, F., Neveu, V., Greiner, R., Scalbert, A., 2013. HMDB 3.0--The Human  
645 Metabolome Database in 2013. *Nucleic Acids Res* 41, D801-807.  
646  
647  
648

649 **TABLES.**

| Metabolite amendment         | Formula                                                       | Molecular weight (g/mol) | Metabolite Class      | WEOC mg/L    | SDM1 mg/L   | SDM1 C ppm   |
|------------------------------|---------------------------------------------------------------|--------------------------|-----------------------|--------------|-------------|--------------|
| Trehalose                    | C <sub>12</sub> H <sub>22</sub> O <sub>11</sub>               | 342.3                    | dihexose              | 12.53        | 20          | 8.4          |
| Fructose                     | C <sub>6</sub> H <sub>12</sub> O <sub>6</sub>                 | 180.2                    | hexose                | 14.53        | 15          | 5.81         |
| Glucose                      | C <sub>6</sub> H <sub>12</sub> O <sub>6</sub>                 | 182.2                    | hexose                | 12.55        | 15          | 5.93         |
| Mannitol                     | C <sub>6</sub> H <sub>14</sub> O <sub>6</sub>                 | 182.2                    | sugar alcohol         | 8.17         | 15          | 5.93         |
| Maltose                      | C <sub>12</sub> H <sub>22</sub> O <sub>11</sub>               | 342.3                    | dihexose              | 2.95         | 5           | 2.11         |
| Alanine                      | C <sub>3</sub> H <sub>7</sub> NO <sub>2</sub>                 | 89.1                     | amino acid            | 0.93         | 2           | 0.81         |
| Arabinose                    | C <sub>5</sub> H <sub>10</sub> O <sub>5</sub>                 | 150.1                    | pentose               | 0.52         | 2           | 0.8          |
| Leucine                      | C <sub>6</sub> H <sub>13</sub> NO <sub>2</sub>                | 131.2                    | amino acid            | 0.7          | 1           | 0.55         |
| Mannose                      | C <sub>6</sub> H <sub>12</sub> O <sub>6</sub>                 | 180.2                    | hexose                | 0.54         | 1           | 0.4          |
| Isoleucine                   | C <sub>6</sub> H <sub>13</sub> NO <sub>2</sub>                | 131.2                    | amino acid            | 0.46         | 1           | 0.55         |
| Arginine                     | C <sub>6</sub> H <sub>14</sub> N <sub>4</sub> O <sub>2</sub>  | 174.2                    | amino acid            | 0.22         | 0.5         | 0.21         |
| Proline                      | C <sub>5</sub> H <sub>9</sub> NO <sub>2</sub>                 | 115.1                    | amino acid            | 0.2          | 0.5         | 0.26         |
| Threonine                    | C <sub>4</sub> H <sub>9</sub> NO <sub>3</sub>                 | 119.1                    | amino acid            | 0.2          | 0.5         | 0.2          |
| Lysine                       | C <sub>6</sub> H <sub>14</sub> N <sub>2</sub> O <sub>2</sub>  | 146.2                    | amino acid            | 0.2          | 0.5         | 0.25         |
| Phenylalanine                | C <sub>9</sub> H <sub>11</sub> NO <sub>2</sub>                | 165.2                    | amino acid            | 0.19         | 0.5         | 0.33         |
| Glycine                      | C <sub>2</sub> H <sub>5</sub> NO <sub>2</sub>                 | 75.1                     | amino acid            | 0.17         | 0.5         | 0.16         |
| Uridine                      | C <sub>9</sub> H <sub>12</sub> N <sub>2</sub> O <sub>6</sub>  | 244.2                    | nucleoside            | 0.16         | 0.5         | 0.22         |
| Glutamate                    | C <sub>5</sub> H <sub>9</sub> NO <sub>4</sub>                 | 147.1                    | amino acid            | 0.11         | 0.1         | 0.04         |
| Serine                       | C <sub>3</sub> H <sub>7</sub> NO <sub>3</sub>                 | 105.1                    | amino acid            | 0.09         | 0.1         | 0.03         |
| Adenosine                    | C <sub>10</sub> H <sub>13</sub> N <sub>5</sub> O <sub>4</sub> | 267.2                    | nucleoside            | 0.08         | 0.1         | 0.04         |
| Gamma-guanidino-butyric acid | C <sub>5</sub> H <sub>11</sub> N <sub>3</sub> O <sub>2</sub>  | 145.2                    | amino acid derivative | 0.05         | 0.1         | 0.04         |
| Hypoxanthine                 | C <sub>5</sub> H <sub>4</sub> N <sub>4</sub> O                | 136.1                    | purine                | 0.04         | 0.1         | 0.04         |
| Guanine                      | C <sub>5</sub> H <sub>5</sub> N <sub>5</sub> O                | 151.1                    | nucleobase            | 0.004        | 0.1         | 0.04         |
| <b>TOTAL</b>                 |                                                               |                          |                       | <b>55.59</b> | <b>81.1</b> | <b>33.15</b> |

650

651

652 **Table 1. Metabolite formulation for soil defined medium 1 (SDM1).** For each metabolite,

653 concentrations are shown for soil WEOC (in mg/L), the amount added to SDM1 (mg/L) and the

654 equivalent carbon ppm.

## FIGURES

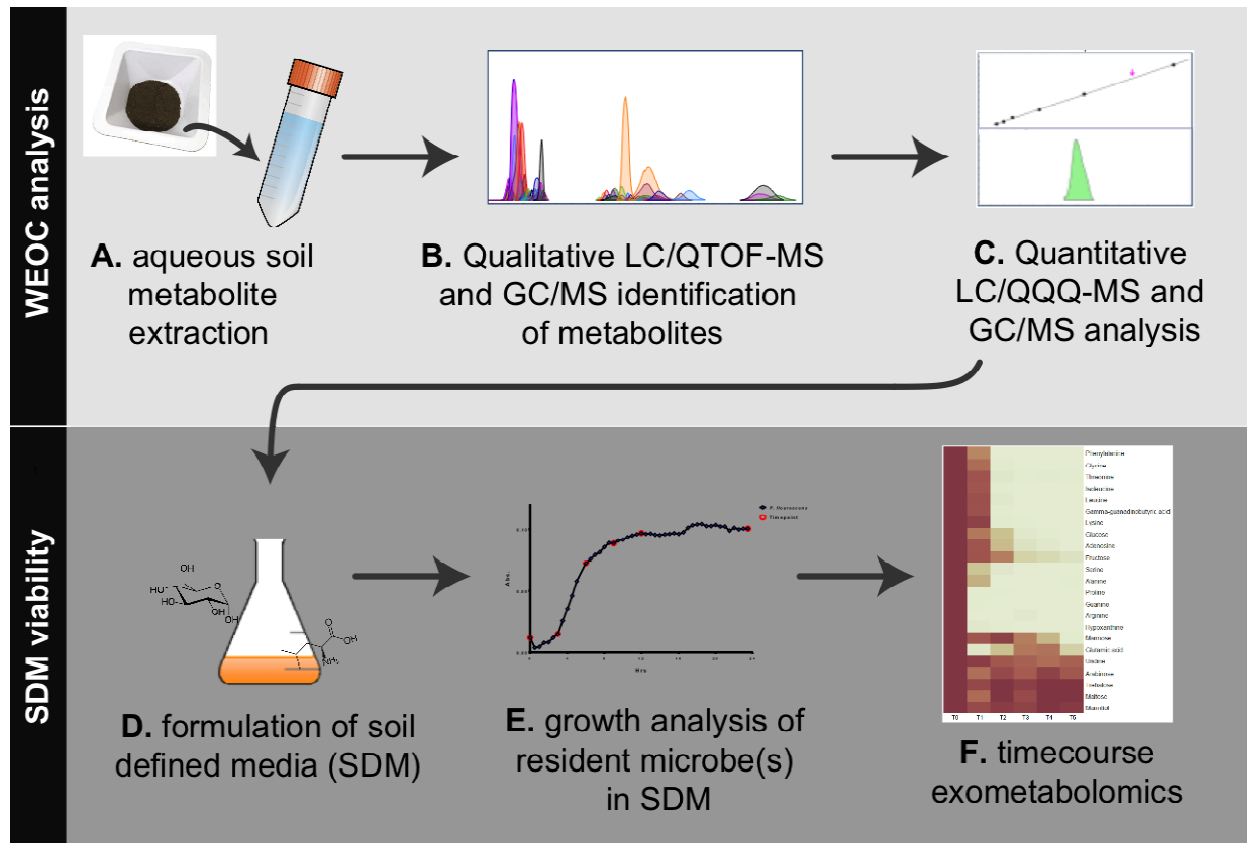

**Figure 1. Workflow overview for the analysis of water extractable organic carbon (WEOC) and soil defined media (SDM).** WEOC analysis is done by (A) extracting soil (sieved and fumigated) with water for 1 h, (B) acquiring scan and MS/MS data by LC/QTOF-MS and EI fragmentation data by GC/MS followed by WEOC metabolite identification and (C) quantitative analysis by LC/QQQ-MS and GC/MS using authentic standards. Based on these data, (D) SDM are formulated, (E) tested for viability using microbes isolated from the study site and (F) timecourse exometabolomics is performed to monitor substrate utilization by bacteria.

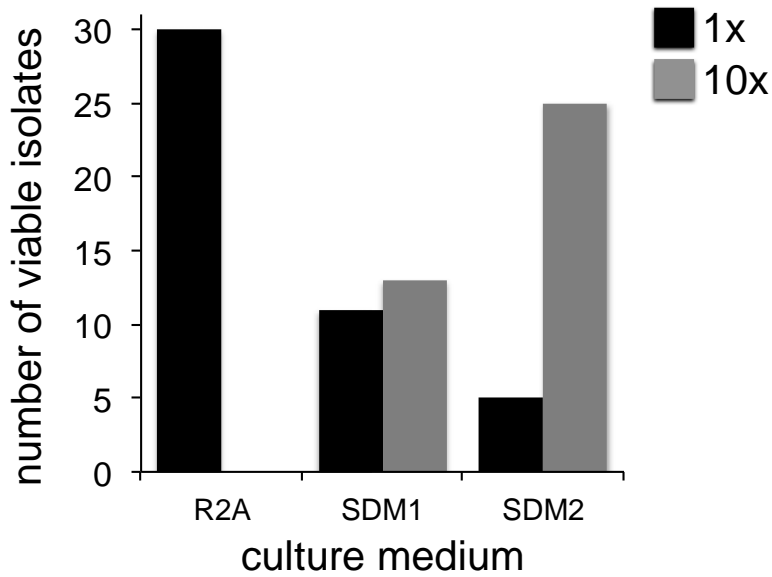

**Figure 2. Isolate growth screen with R2A, SDM1 and SDM2.** Each medium was tested (at 1x concentration for R2A and SDM and 10x for SDM) in its ability to support the growth of 30 phylogenetically diverse isolates from the ORFRC.

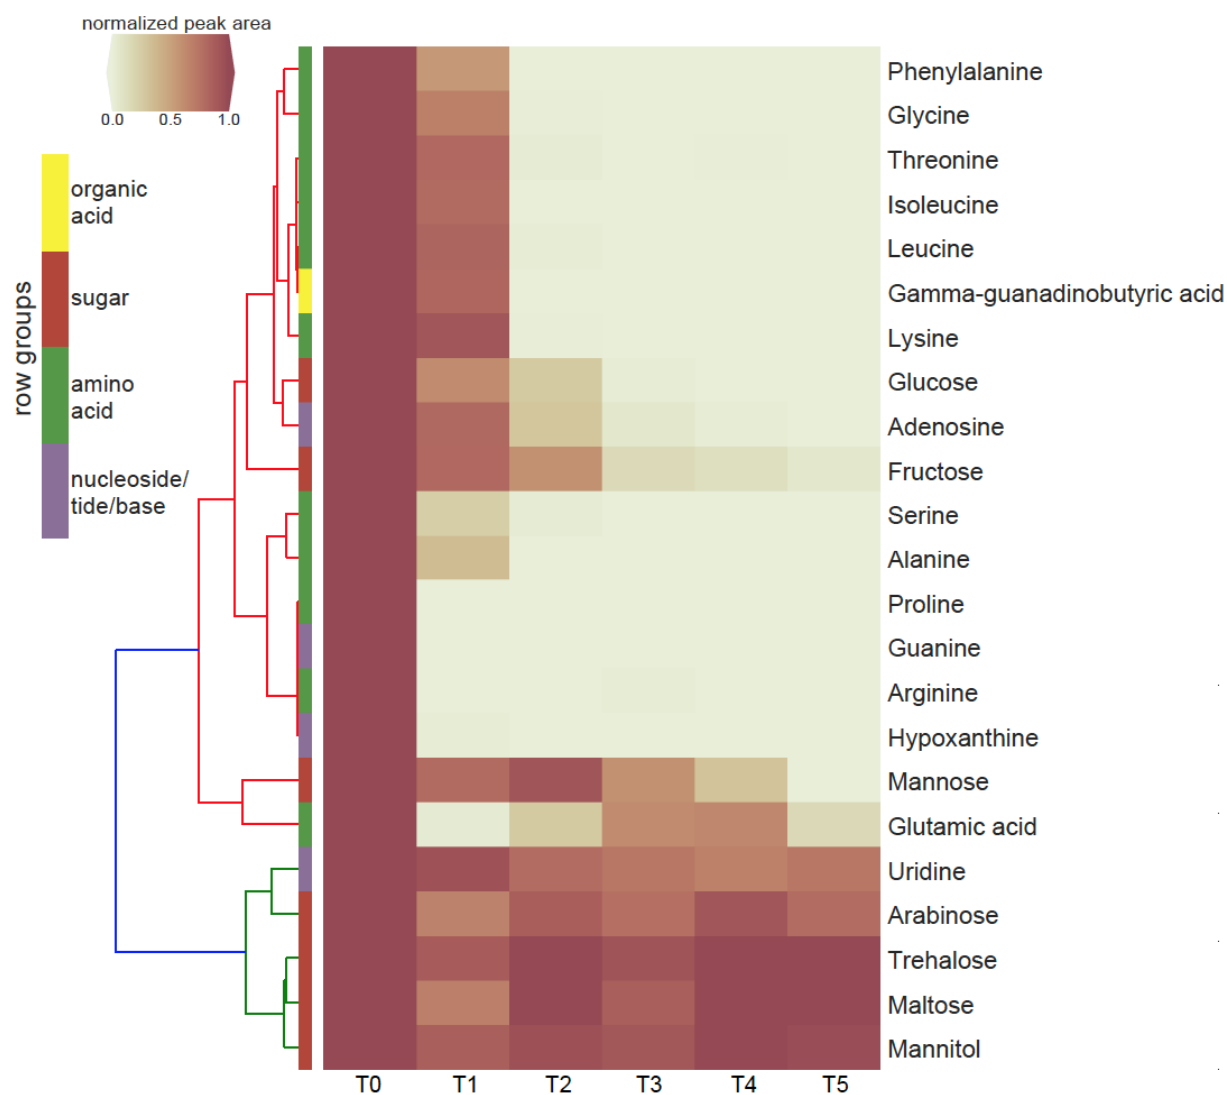

**Figure 3. Clustering heatmap of normalized peak areas for SDM1 metabolites across timecourse sampling of *Pseudomonas sp.* FW300-N2E2 spent media.** Levels are displayed in terms of relative ratio to initial concentration at time zero (T0) with T0-5 representing 0, 3, 6, 9, 12 and 24 h time points, respectively. Metabolite row groups are colored according to the metabolite class they belong to.
